# Supplementary material
Source: PubMed Central journal article supplement (PMC2486425)

## Supplementary Figure Legends

### Supplementary Figure S1. The effects of RASSF1C on cell-cycle distribution and p53 activity

(A) HCT116 cells (p53<sup>+/+</sup>, p53<sup>-/-</sup> and p53<sup>-/-</sup> complemented with HA-p53) were transfected with pcDNA-CD4 and HA-RASSF1C. The cell-cycle profile of CD4-positive cells was determined 36 h after transfection. Data are expressed as means  $\pm$  standard errors of values from three independent experiments. (B) Lysates of cells in (A) were analyzed by immunoblotting for the indicated proteins. (C) U2OS cells were co-transfected with pGL3-p53-responsive reporter and pcDNA3- $\beta$ -Gal reporter constructs and the indicated combinations of pcDNA3-HA-p53 and HA-RASSF1A or HA-RASSF1C. Cell lysates were subjected to immunoblot and luciferase assays. Luciferase activity was normalized to  $\beta$ -galactosidase activity and expressed relative to that in cells transfected with the empty vector. Data are expressed as means  $\pm$  standard errors of values from three independent experiments. Asterisks indicate nonspecific bands.

### Supplementary Figure S2. The effects of RASSF1C on p53 stability

(A) U2OS cells transfected with HA-RASSF1C were incubated for the indicated times with cycloheximide (50  $\mu$ g/ml) and analyzed by immunoblotting. (B) U2OS cells transfected with His<sub>6</sub>-tagged ubiquitin were co-transfected with a combination of Flag-MDM2, HA-p53, and HA-RASSF1C, as indicated. Cells were treated with MG132 (20  $\mu$  M) for 6 h prior to harvesting. The His<sub>6</sub>-purified fractions were analyzed for ubiquitinated p53. Molecular weights are in kDa.

**Supplementary Figure S3. Regulation of p53 stability by RASSF1A and interaction of RASSF1A with MDM2**

(A) *Mdm2*<sup>+/+</sup>*p53*<sup>-/-</sup> and *Mdm2*<sup>-/-</sup>*p53*<sup>-/-</sup> MEFs transiently transfected with HA-p53 and HA-RASSF1A, or the corresponding empty vector (control), were incubated for the indicated times with cycloheximide (50 µg/ml) and then analyzed by immunoblotting for the indicated proteins. (B) RASSF1A directly interacts with MDM2 but not with p53 *in vitro*. RASSF1A, MDM2, and p53 proteins were *in vitro* translated (IVT) in the presence of [<sup>35</sup>S] methionine and mixed. Cell lysates were immunoprecipitated with anti-RASSF1A and analyzed by SDS-PAGE and autoradiography. (C) *Mdm2*<sup>-/-</sup>*p53*<sup>-/-</sup> MEFs transiently transfected with the indicated expression plasmids were immunoprecipitated with an anti-RASSF1A antibody and analyzed by immunoblotting.

**Supplementary Figure S4. Interaction of RASSF1A with MDM2 and DAXX in the nucleus**

(A) 0.2% (w/v) Triton X-100-permeabilized U2OS cells were fixed and stained with anti-RASSF1A (*green*) or anti-MDM2 (*red*) antibodies. Scale bar, 10 µm. (B) U2OS cell lysates were fractionated into nuclear and cytoplasmic fractions and analyzed by immunoblotting for the indicated proteins. β-tubulin and HDAC1 were used as cytoplasmic and nuclear markers, respectively (*left*). Both nuclear and cytoplasmic extracts were immunoprecipitated (IP) with an anti-RASSF1A antibody and the resulting precipitates were analyzed by immunoblotting for the indicated proteins (*right*). Asterisks indicate nonspecific bands. (C) 0.2% (w/v) Triton X-100-permeabilized U2OS cells were fixed and stained with anti-RASSF1A (*green*) or anti-DAXX (*red*) antibodies. Scale bar, 10 µm.

**Supplementary Figure S5. Effects of the N-terminal region of RASSF1A on MDM2 and p53 stability.** (A) *Mdm2*<sup>-/-</sup>*p53*<sup>-/-</sup> MEFs were transfected with MDM2 and the cell lysates were analyzed by immunoblotting for the indicated proteins. Fold induction of Rassf1a level was calculated using the densities of Rassf1a/Actin. (B) U2OS cells were co-transfected with expression vectors for HA-p53, pCMV-MDM2, or HA-RASSF1A-N, as indicated. The cell lysates were analyzed by immunoblotting for the indicated proteins. (C) U2OS cells were co-transfected with expression vectors for HA-p53, pCMV-MDM2, or HA-RASSF1A-C, as indicated. The cell lysates were analyzed by immunoblotting for the indicated proteins.

**Supplementary Figure S6. RASSF1A disrupts MDM-DAXX-HAUSP interactions *in vivo*.** *Mdm2*<sup>-/-</sup>*p53*<sup>-/-</sup> MEFs co-transfected with MDM2 and Flag-DAXX or Myc-HAUSP and increasing amounts of HA-RASSF1A were treated with MG132 for 6 h and Cell lysates were analyzed by immunoblotting as in **Figure 6A**.

**Supplementary Figure S7. Effects of RASSF1C on the MDM2-DAXX-HAUSP interactions *in vivo***

(A, B, C) *Mdm2*<sup>-/-</sup>*p53*<sup>-/-</sup> MEFs transfected with MDM2, Flag-DAXX, Myc-HAUSP or HA-RASSF1C as indicated were treated with MG132 for 6 h and immunoprecipitated (IP) with anti-MDM2 or anti-Flag antibodies. The resulting precipitates were analyzed by immunoblotting.

**Supplementary Figure S8. Inhibition of HAUSP-mediated MDM2 deubiquitination by RASSF1A**

(A) U2OS cells transfected with Myc-HAUSP with or without HA-RASSF1A were incubated for the indicated times with cycloheximide (50  $\mu$ g/ml) and analyzed by immunoblotting. (B) U2OS cells co-transfected with His<sub>6</sub>-tagged ubiquitin, Myc-HAUSP, and HA-RASSF1A were treated with MG132 (20  $\mu$  M) for 6 h and then harvested. The His<sub>6</sub>-purified fractions were analyzed for ubiquitinated MDM2.

Molecular weights are in kDa.

**Supplementary Figure S9. RASSF1A promotes p53 activation by decreasing MDM2 levels upon  $\gamma$ -irradiation treatment.**

U2OS cells stably expressing pcDNA4/TO-HA-RASSF1A were incubated without (mock-treated) or with tetracycline (1  $\mu$  M) for 24 h to induce RASSF1A expression. The cells were subsequently exposed to 10 Gy of  $\gamma$ -irradiation, incubated for the indicated times, and then analyzed by immunoblotting for the indicated proteins.

Supplementary Figure S1

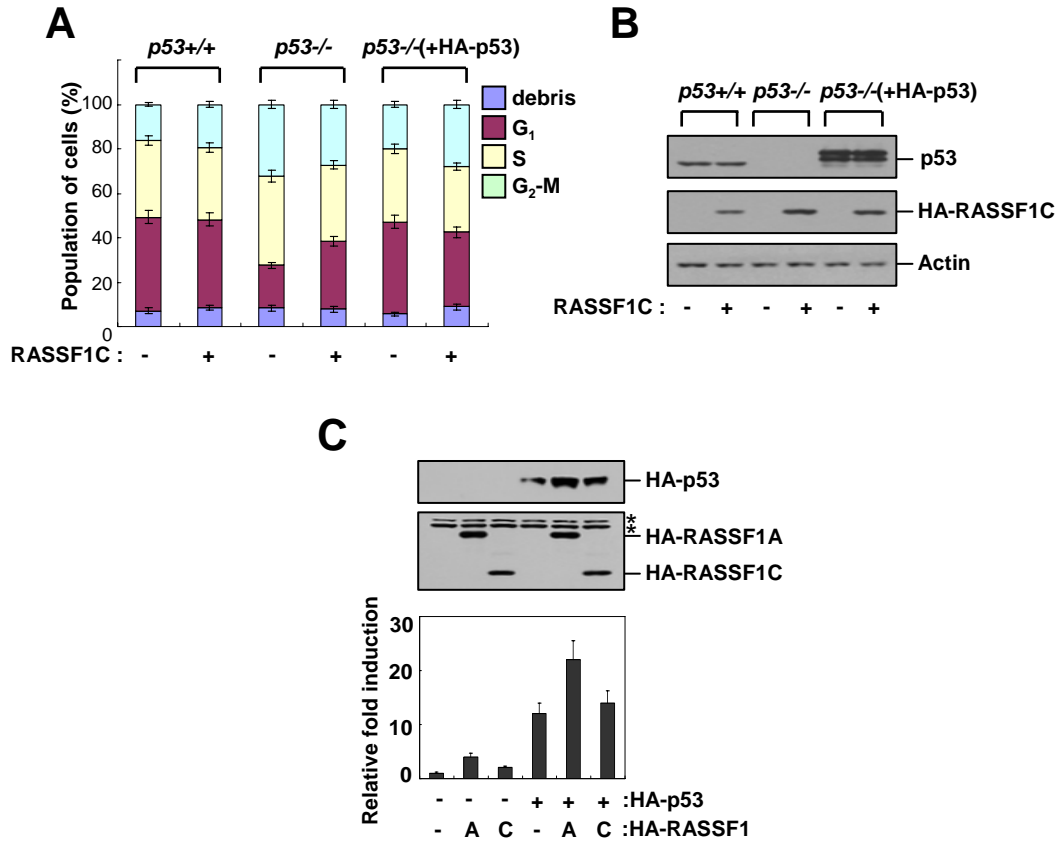

Supplementary Figure S2

**A**

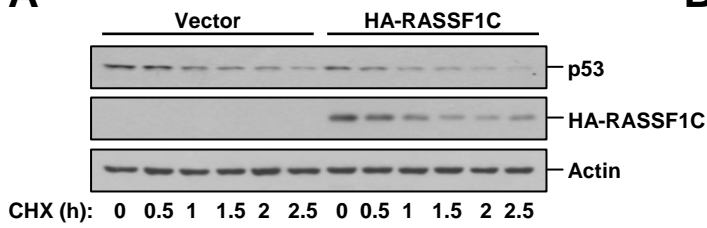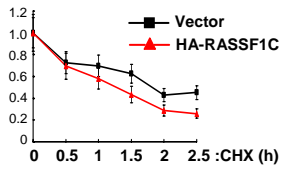

**B**

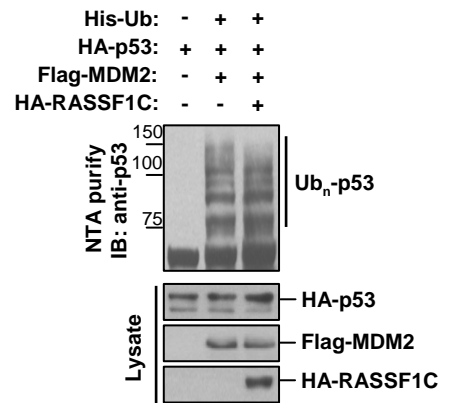

**Supplementary Figure S3**

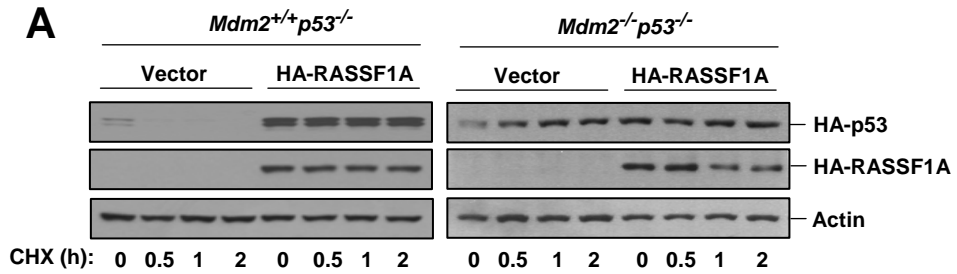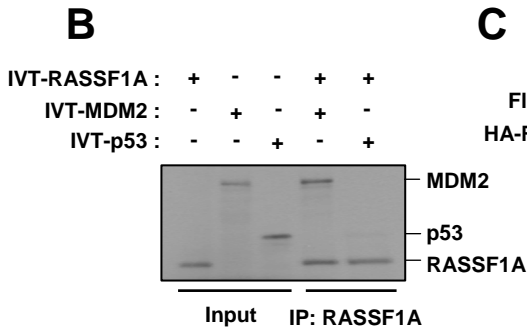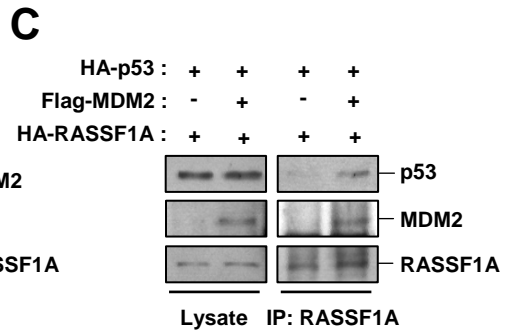

**Supplementary Figure S4**

**A**

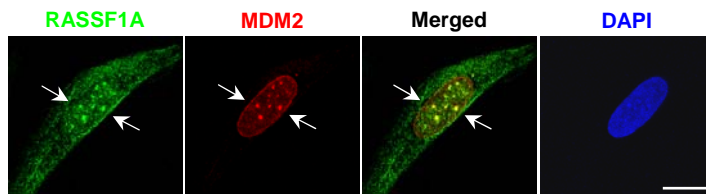

**B**

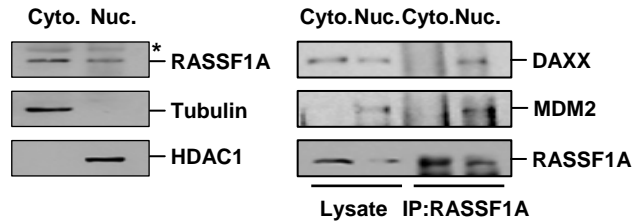

**C**

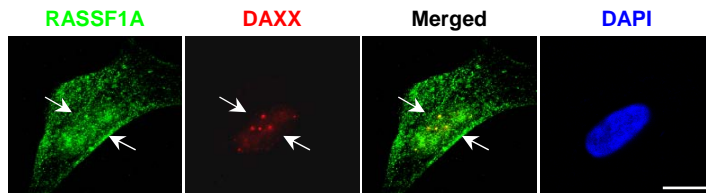



Supplementary Figure S5

**A**

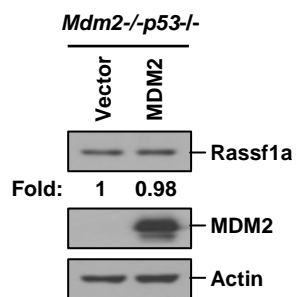

**B**

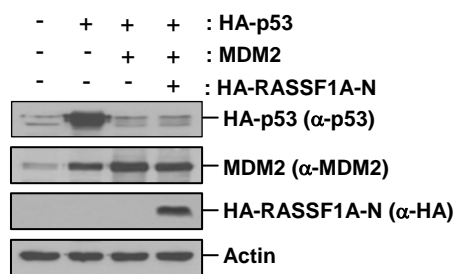

**C**

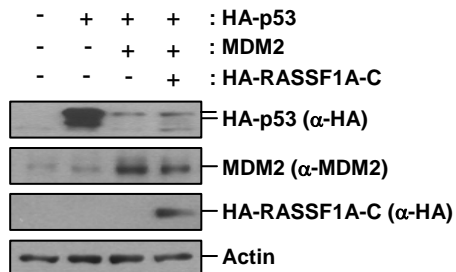

**Supplementary Figure S6**

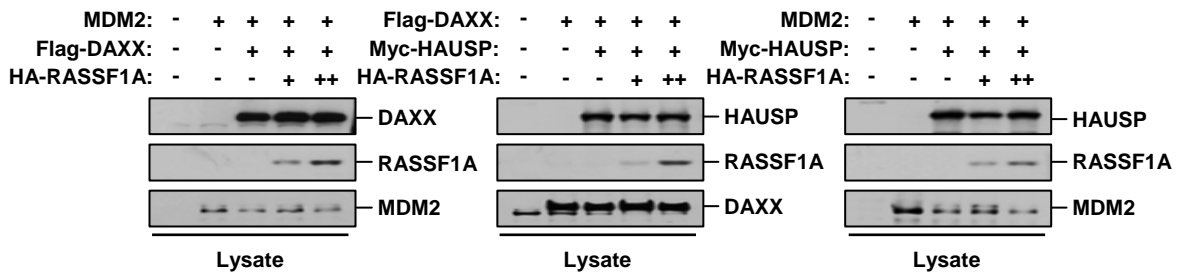

**Supplementary Figure S7**

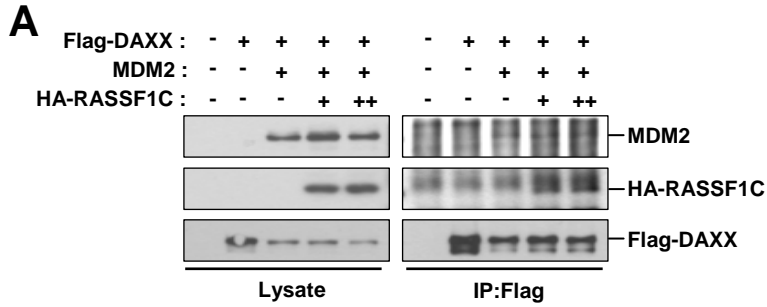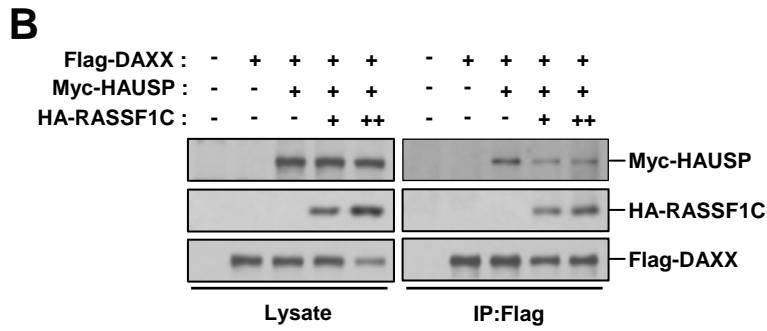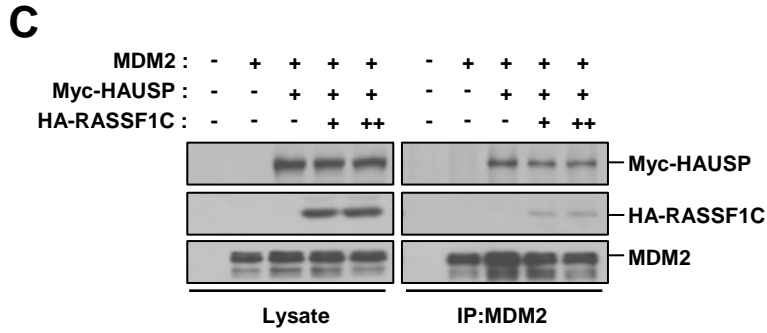

**Supplementary Figure S8**

**A**

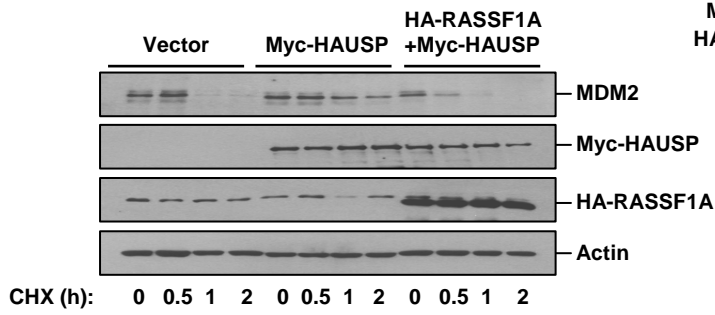

**B**

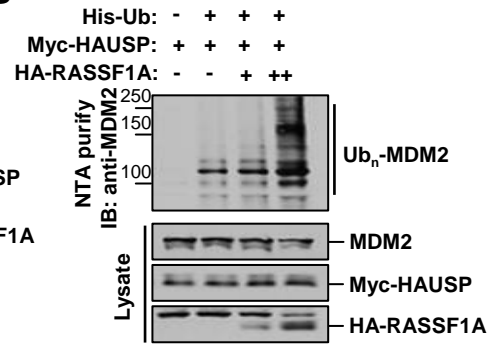

**Supplementary Figure S9**

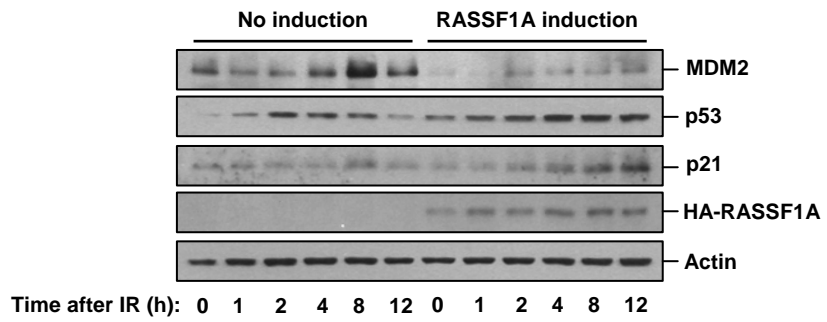

Supplement: emboj2008115s1.pdf [file emboj2008115s1.pdf]
